# Supplementary material
Source: PubMed Central journal article supplement (PMC3412348)
Supplement: supp_blood-2012-02-407999_blood-2012-02-407999-1.pdf [file supp_blood-2012-02-407999_blood-2012-02-407999-1.pdf]

## **Supplemental Information**

### **Cytotoxic effects of Bortezomib in Myelodysplastic syndrome/Acute Myeloid Leukemia depend on autophagy-mediated lysosomal degradation of TRAF6 and repression of PSMA1**

Jing Fang, Garrett Rhyasen, Lyndsey Bolanos, Christopher Rasch, Melinda Varney, Mark Wunderlich, Susumu Goyama, Gerrit Jansen, Jacqueline Cloos, Carmela Rigolino, Agostino Cortelezzi, James C. Mulloy, Esther N. Oliva, Maria Cuzzola, Daniel Starczynowski

#### **Material and Methods**

##### **Culture conditions**

THP-1 and HL60 cells were cultured in RPMI1640 supplemented with 10% fetal bovine serum (S12450; Atlanta Biologicals). TF-1 cells were maintained in the presence of 10ng/mL human interleukin 3 (hIL-3) (Stem Cell Technologies). The myelodysplastic cell line, MDS-L, was maintained in 10ng/mL hIL-3. CD34<sup>+</sup> cells were positively selected from cryopreserved marrow or peripheral blood cells by immunomagnetic separation (CCHMC Core) and maintained in StemSpan SFEM (StemCell Technologies) containing 10ng/mL of human stem-cell factor (hSCF) (Stem Cell Technologies), human Flt3 ligand (hFL), human thrombopoietin (hTPO), hIL-3 and hIL-6 (Stem Cell Technologies).

##### **Methylcellulose**

Cells were treated with Bort at the concentration of 10nM and DMSO for 24 hours, and were then plated in methylcellulose (04434; StemCell Technologies) at the number of  $5 \times 10^3$  THP-1 cells/plate,  $1 \times 10^4$  MDSL cells/plate and  $1 \times 10^4$  bone marrow cells per plate from patients. The colonies were evaluated after 10 days. For the shTRAF6 knockdown purpose, cells were transduced, GFP positive cells were sorted with flow cytometry, and  $3 \times 10^3$  transduced cells/plate were plated in methylcellulose for 10 days.

##### **qPCR**

RNA was extracted with Quick-RNA MiniPrep Kit (Zymo research), reverse transcribed into cDNA with High Capacity RNA-to-cDNA Kit (Invitrogen). Quantitative PCR was performed with Taqman Master Mix (Applied Biosystems) for TRAF6 (Hs00371512-g1; Applied Biosystems) and PSMA1 (Hs00267631\_m1; Applied Biosystems). GAPDH (Hs02758991; Applied Biosystems) was used as an internal control.

### **Lentiviral Infections**

Lentiviruses were pseudotyped with VSV-G, produced by 293-FT cells, and concentrated by ultracentrifugation at 20,000rpm for 2 hours at 4°C. Cells at  $1 \times 10^5$ /mL were transduced lentivirus at multiplicity of infection (MOI) of 0.5~1 and in the presence of 8µg/mL of polybrene (No. TR-1003-G; Millipore). At 48 hours post-transduction, GFP positive cells were isolated by fluorescence-activated cell sorting (FACS). The pLKO.1 (OpenBiosystems) constructs were obtained from the Lentiviral core at CCHMC and used to express shCTL, shTRAF6, and shPSMA1. Puromycin resistance gene was replaced by green fluorescent protein (GFP). Two independent and validated pLKO.1-shT6 constructs were obtained: TRCN0000007348 (#48) and TRCN0000007351 (#3). Two independent pLKO.1-shPSMA1 constructs were obtained: TRCN0000003870 and TRCN0000003872.

Supplemental Table 1. Proteasome subunit gene expression in TF-1 cells expressing shTRAF6.

| Fold Change (shT6 vs vec) | up/down (shT6 vs vec) | Gene   | Gene Description                                                                          |
|---------------------------|-----------------------|--------|-------------------------------------------------------------------------------------------|
| 1.8734876                 | down                  | PSMA1  | proteasome (prosome, macropain) subunit, alpha type, 1                                    |
| 1.3505317                 | down                  | PSMB8  | proteasome (prosome, macropain) subunit, beta type, 8 (large multifunctional peptidase 7) |
| 1.3500321                 | down                  | PSMB8  | proteasome (prosome, macropain) subunit, beta type, 8 (large multifunctional peptidase 7) |
| 1.346279                  | down                  | PSMB8  | proteasome (prosome, macropain) subunit, beta type, 8 (large multifunctional peptidase 7) |
| 1.1870465                 | down                  | PSMA3  | proteasome (prosome, macropain) subunit, alpha type, 3                                    |
| 1.1174587                 | down                  | PSME3  | proteasome (prosome, macropain) activator subunit 3 (PA28 gamma; Ki)                      |
| 1.0988634                 | down                  | PSMD10 | proteasome (prosome, macropain) 26S subunit, non-ATPase, 10                               |
| 1.0855404                 | down                  | PSMG3  | proteasome (prosome, macropain) assembly chaperone 3                                      |
| 1.0690852                 | down                  | PSMG1  | proteasome (prosome, macropain) assembly chaperone 1                                      |
| 1.0629337                 | down                  | PSMG4  | proteasome (prosome, macropain) assembly chaperone 4                                      |
| 1.0629029                 | down                  | PSME2  | proteasome (prosome, macropain) activator subunit 2 (PA28 beta)                           |
| 1.0617175                 | down                  | PSMD9  | proteasome (prosome, macropain) 26S subunit, non-ATPase, 9                                |
| 1.051004                  | down                  | PSMD7  | proteasome (prosome, macropain) 26S subunit, non-ATPase, 7                                |
| 1.0454882                 | down                  | PSMB10 | proteasome (prosome, macropain) subunit, beta type, 10   chymotrypsin-like                |
| 1.03699                   | down                  | PSMB9  | proteasome (prosome, macropain) subunit, beta type, 9 (large multifunctional peptidase 2) |
| 1.0353343                 | down                  | PSMB9  | proteasome (prosome, macropain) subunit, beta type, 9 (large multifunctional peptidase 2) |
| 1.0338808                 | down                  | PSMB9  | proteasome (prosome, macropain) subunit, beta type, 9 (large multifunctional peptidase 2) |
| 1.033211                  | down                  | PSMD6  | proteasome (prosome, macropain) 26S subunit, non-ATPase, 6                                |
| 1.0238222                 | down                  | PSMA6  | proteasome (prosome, macropain) subunit, alpha type, 6   KIAA0391                         |
| 1.0161107                 | down                  | PSMA4  | proteasome (prosome, macropain) subunit, alpha type, 4                                    |
| 1.0122166                 | down                  | PSMF1  | proteasome (prosome, macropain) inhibitor subunit 1 (PI31)                                |
| 1.0026861                 | down                  | PSMB4  | proteasome (prosome, macropain) subunit, beta type, 4                                     |
| 1.2984062                 | up                    | PSMB5  | proteasome (prosome, macropain) subunit, beta type, 5                                     |
| 1.1996164                 | up                    | PSMC3  | proteasome (prosome, macropain) 26S subunit, ATPase, 3                                    |
| 1.193569                  | up                    | PSME4  | proteasome (prosome, macropain) activator subunit 4                                       |
| 1.1910173                 | up                    | PSMD12 | proteasome (prosome, macropain) 26S subunit, non-ATPase, 12                               |
| 1.1774843                 | up                    | PSMD3  | proteasome (prosome, macropain) 26S subunit, non-ATPase, 3                                |
| 1.1671897                 | up                    | PSMD1  | proteasome (prosome, macropain) 26S subunit, non-ATPase, 1                                |
| 1.1637437                 | up                    | PSMC5  | proteasome (prosome, macropain) 26S subunit, ATPase, 5                                    |
| 1.1555178                 | up                    | PSMB7  | proteasome (prosome, macropain) subunit, beta type, 7                                     |
| 1.1280228                 | up                    | PSMB1  | proteasome (prosome, macropain) subunit, beta type, 1                                     |
| 1.1222794                 | up                    | PSMD5  | proteasome (prosome, macropain) 26S subunit, non-ATPase, 5                                |
| 1.1183304                 | up                    | PSMC6  | proteasome (prosome, macropain) 26S subunit, ATPase, 6                                    |
| 1.1099048                 | up                    | PSMD2  | proteasome (prosome, macropain) 26S subunit, non-ATPase, 2                                |
| 1.1052538                 | up                    | PSMB3  | proteasome (prosome, macropain) subunit, beta type, 3                                     |
| 1.1052232                 | up                    | PSMB2  | proteasome (prosome, macropain) subunit, beta type, 2                                     |
| 1.0936346                 | up                    | PSMC2  | proteasome (prosome, macropain) 26S subunit, ATPase, 2                                    |
| 1.0866498                 | up                    | PSMD4  | proteasome (prosome, macropain) 26S subunit, non-ATPase, 4                                |
| 1.0845578                 | up                    | PSMD14 | proteasome (prosome, macropain) 26S subunit, non-ATPase, 14                               |
| 1.079188                  | up                    | PSMC4  | proteasome (prosome, macropain) 26S subunit, ATPase, 4                                    |
| 1.0766393                 | up                    | PSMD13 | proteasome (prosome, macropain) 26S subunit, non-ATPase, 13                               |
| 1.072969                  | up                    | PSMC6  | proteasome (prosome, macropain) 26S subunit, ATPase, 6                                    |
| 1.0683745                 | up                    | PSMD11 | proteasome (prosome, macropain) 26S subunit, non-ATPase, 11                               |
| 1.0517234                 | up                    | PSMD8  | proteasome (prosome, macropain) 26S subunit, non-ATPase, 8                                |
| 1.0504658                 | up                    | PSME1  | proteasome (prosome, macropain) activator subunit 1 (PA28 alpha)                          |
| 1.0481962                 | up                    | PSMA2  | proteasome (prosome, macropain) subunit, alpha type, 2                                    |
| 1.0440398                 | up                    | PSMB6  | proteasome (prosome, macropain) subunit, beta type, 6                                     |
| 1.0342671                 | up                    | PSMC1  | proteasome (prosome, macropain) 26S subunit, ATPase, 1                                    |
| 1.0275017                 | up                    | PSMA7  | proteasome (prosome, macropain) subunit, alpha type, 7                                    |
| 1.0243065                 | up                    | PSMC1  | proteasome (prosome, macropain) 26S subunit, ATPase, 1                                    |
| 1.012733                  | up                    | PSMA5  | proteasome (prosome, macropain) subunit, alpha type, 5                                    |
| 1.0127015                 | up                    | PSMG2  | proteasome (prosome, macropain) assembly chaperone 2                                      |

**Supplemental Table 2. TRAF6 and drug gene signature overlap.**

| <b>Name</b>              | <b>P-value</b> | <b>Hit Count in Query List</b> | <b>Hit Count in Genome</b> |
|--------------------------|----------------|--------------------------------|----------------------------|
| Sirolimus                | 0.000014       | 10                             | 97                         |
| Rapamycin                | 0.000185       | 30                             | 784                        |
| Epigallocatechin gallate | 0.001515       | 10                             | 171                        |
| Disulfiram               | 0.01439        | 4                              | 50                         |
| ALLN                     | 0.002585       | 13                             | 280                        |
| Bortezomib               | 0.042916       | 4                              | 70                         |

Supplemental Figure 1.

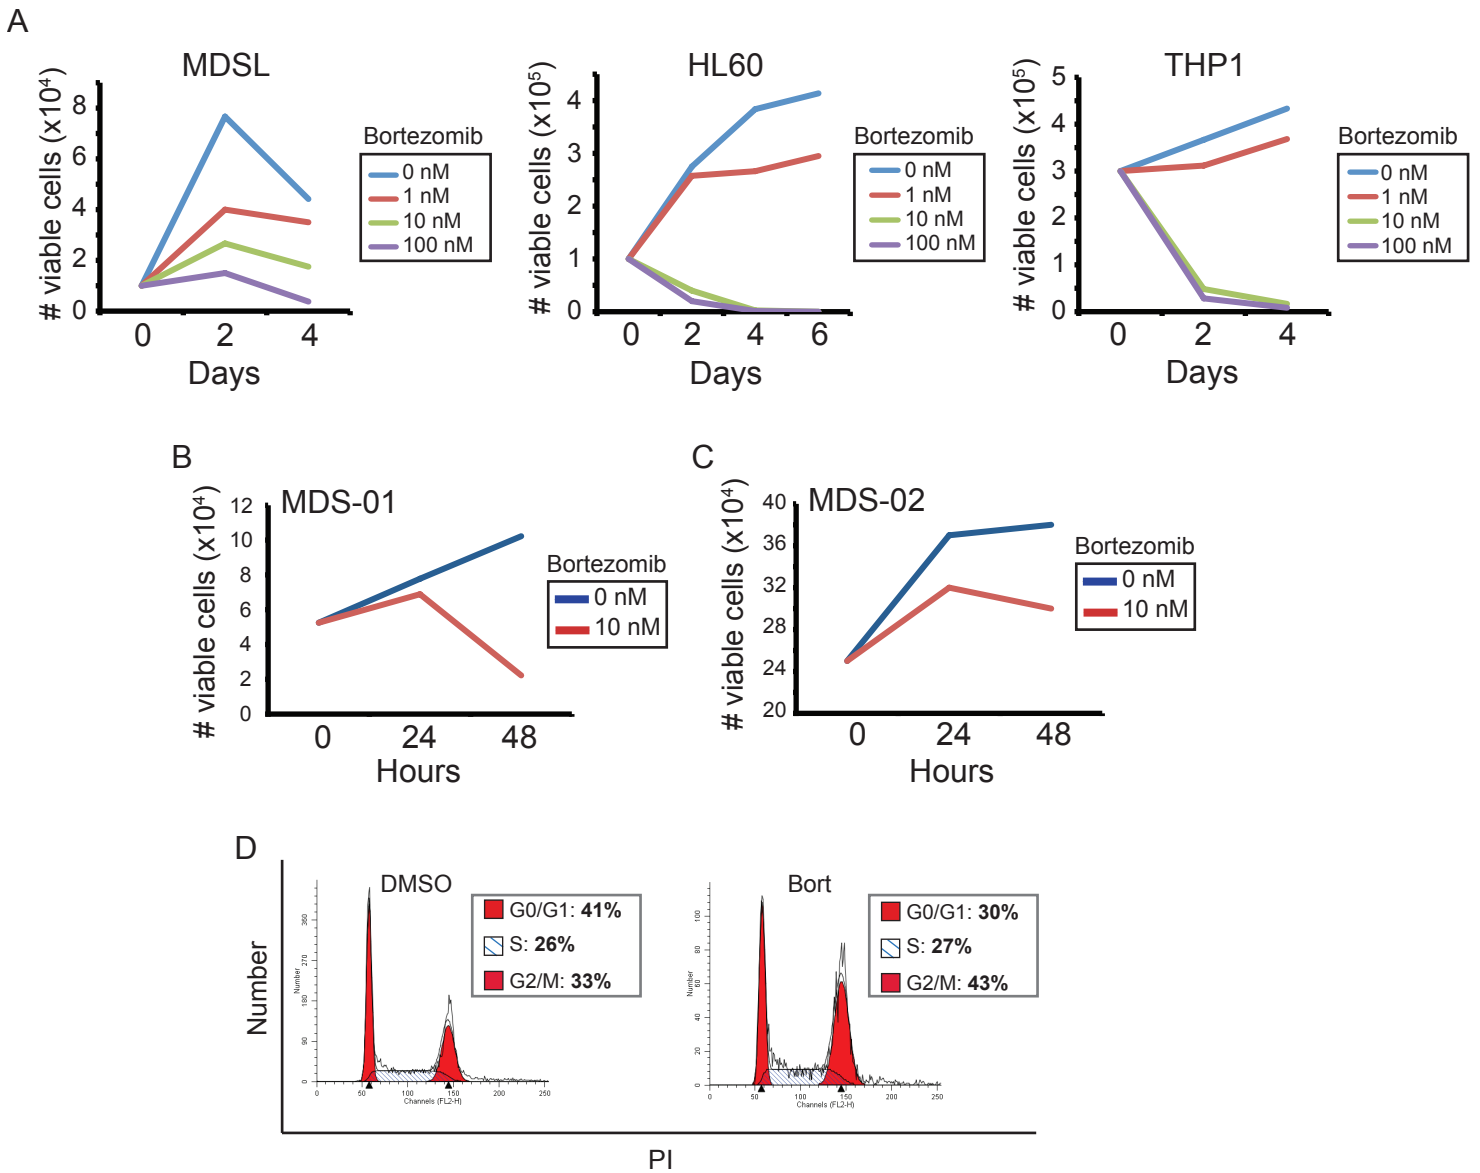

**Inhibitory effect of Bortezomib on MDS and AML cell line viability and cell cycle.** (A) The indicated cell lines were treated with increasing concentrations of Bortezomib for upto 6 days. Cell viability was measured by trypan blue exclusion. (B-C) Marrow cells from MDS patients (MDS-01 and MDS-02) were treated with DMSO or 10 nM Bortezomib and viable cells (trypan blue exclusion) were measured at the indicated time points. (D) TF-1 cells were treated with Bortezomib for 24 hours and analyzed for cell cycle status by staining with propidium iodide (PI).

Supplemental Figure 2.

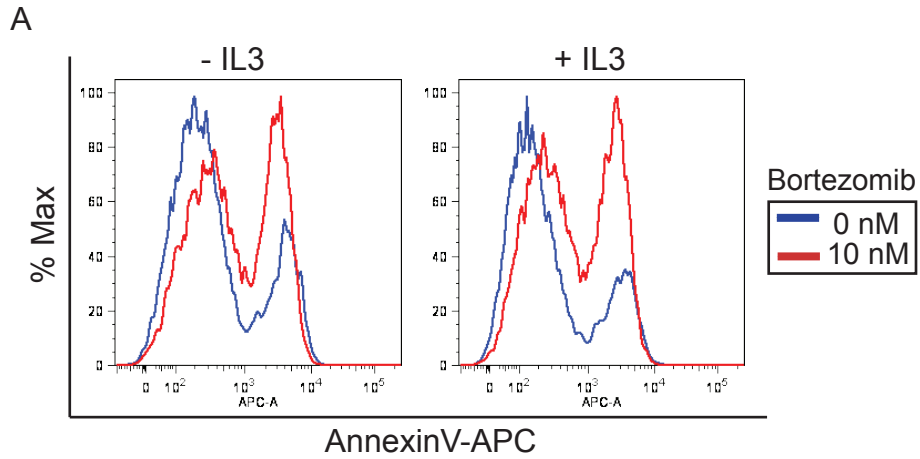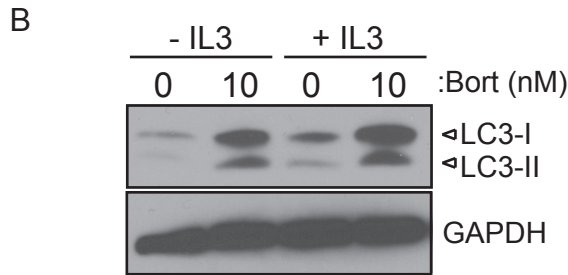

**Effects of Bortezomib on viability and conversion of LC3B is not dependent on cytokines.** TF-1 cells cultured with or without IL-3 were treated with Bortezomib for 24 hours and analyzed for cell viability by staining for AnnexinV-positive cells (A) and expression of LC3B by immunoblotting (B).

Supplemental Figure 3

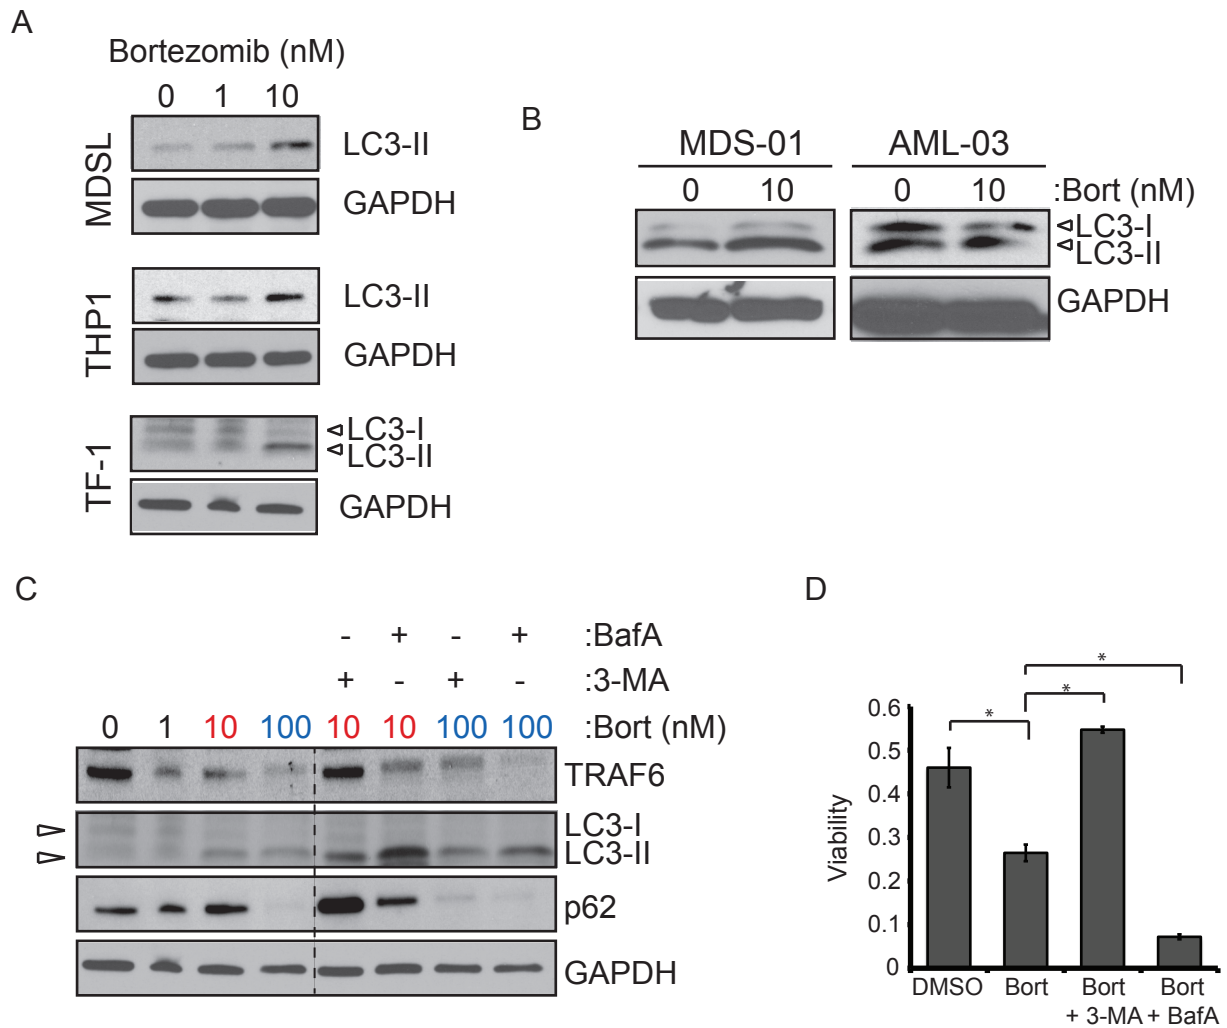

**Bortezomib induces markers of autophagy in MDS/AML cells.** (A-B) Cell lines and primary cells were cultured with the indicated amounts of Bortezomib for 24 hours. LC3B and GAPDH protein was determined by immunoblot analysis. (C) TF-1 cells were cultured with the indicated concentrations of Bortezomib and co-treated with BaflomycinA (100 nM; BafA) or 3-methyladenine (5 mM; 3-MA). Protein lysates were evaluated for TRAF6, LC3-I/II, p62, and GAPDH. (D) TF-1 cells were treated with Bortezomib (10 nM), 3-MA (5 mM), and/or BafA (100 nM) for 24 hours. Cell viability was measured by MTT assay.

Supplemental Figure 4.

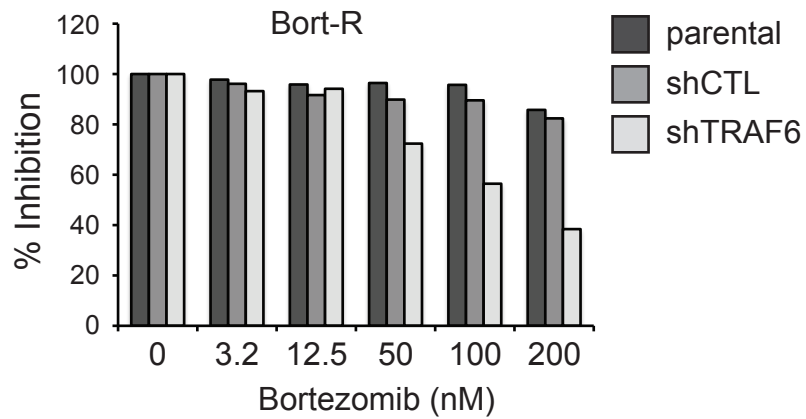

**Evaluation of Bortezomib-resistant THP1 cells expressing shTRAF6.** Bortezomib-resistant (Bort-R) THP1 cells were transduced with control shRNA (shCTL), shTRAF6, or mock transduced. Cell viability was determined at the indicated Bortezomib concentrations after 24 hour treatment. Parental and shCTL-transduced cells are resistant to Bortezomib. In contrast, knock-down of TRAF6 results in reduced viability when treated with Bortezomib.



Supplemental Figure 5.

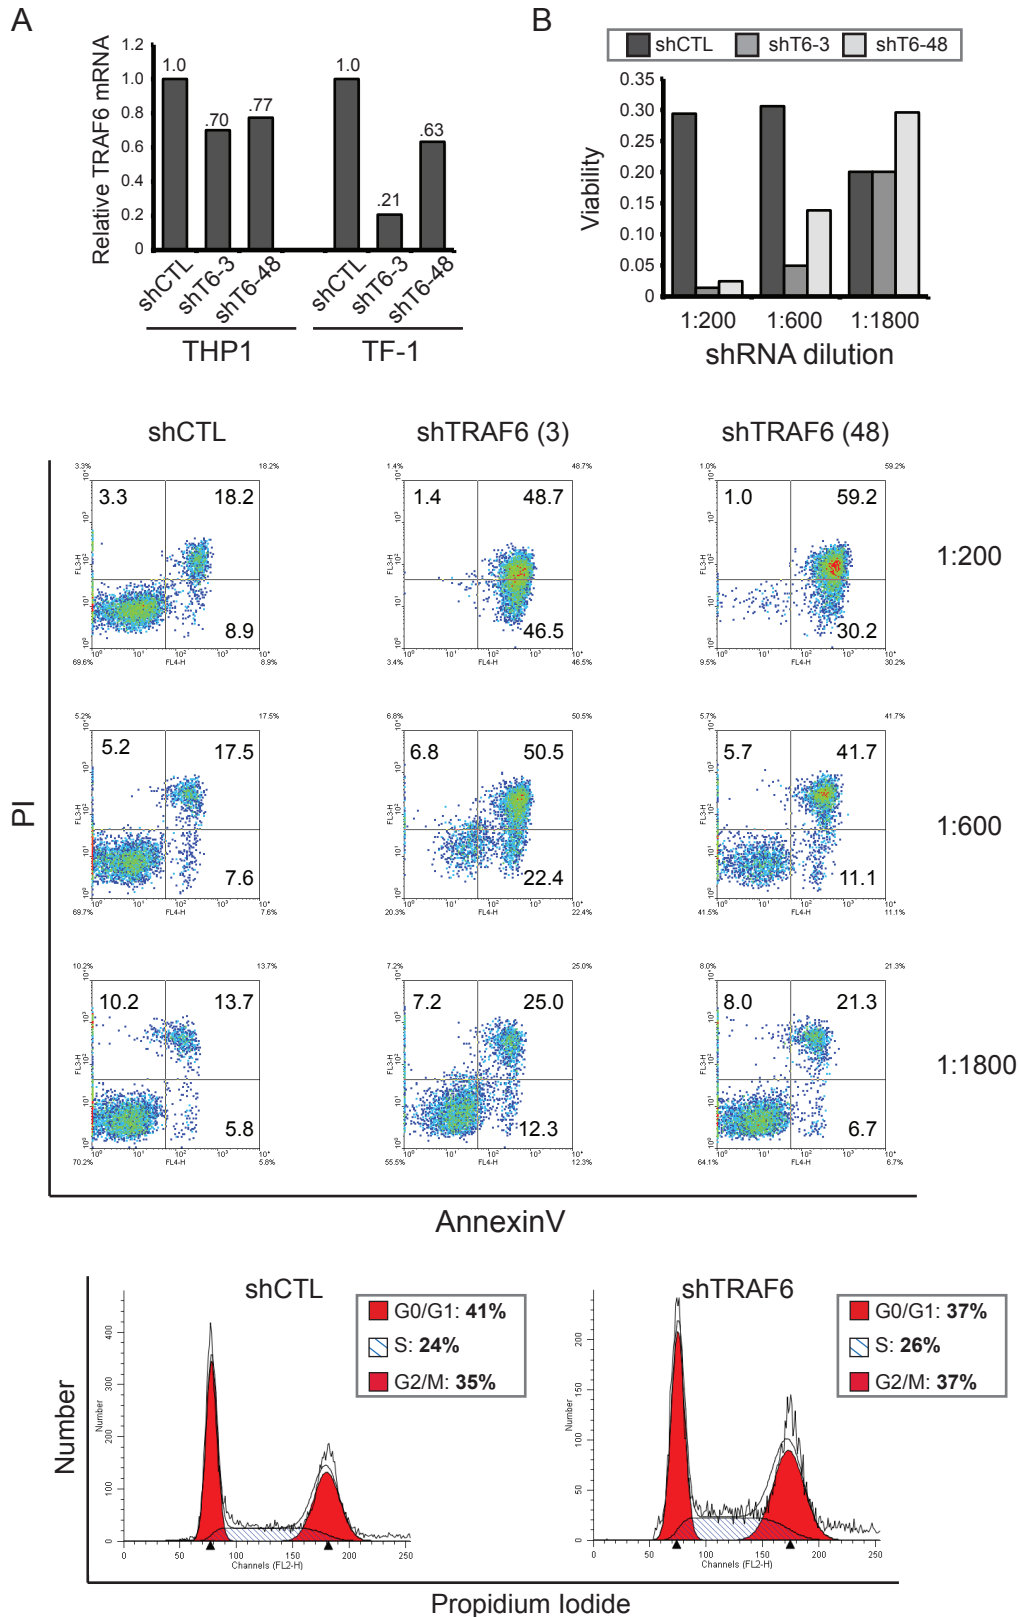

**Depletion of TRAF6 with independent shRNA-targeting constructs** (A) HL-60 and THP-1 cells were transduced with two shTRAF6 constructs or vector control. Knockdown of TRAF6 mRNA was confirmed by qPCR. (B) TF-1 cells transduced with increasing concentrations of virus encoding shCTL or two independent shTRAF6 constructs were evaluated for cell viability using the MTT assay. Cell viability is shown at the indicated viral dilutions. (C) Cell survival of transduced TF-1 cells was confirmed by AnnexinV/PI staining 5.5 days post-transduction with the indicated viral dilutions. (D) Cell cycle of TF-1 cells transduced with shCTL or shTRAF6 was determined by flow cytometry for PI incorporation. Flow plots show G0/G1, S, and G2/M phases of the cell cycle for shCTL and shTRAF6 expressing cells 4 days post transduction.

Supplemental Figure 6.

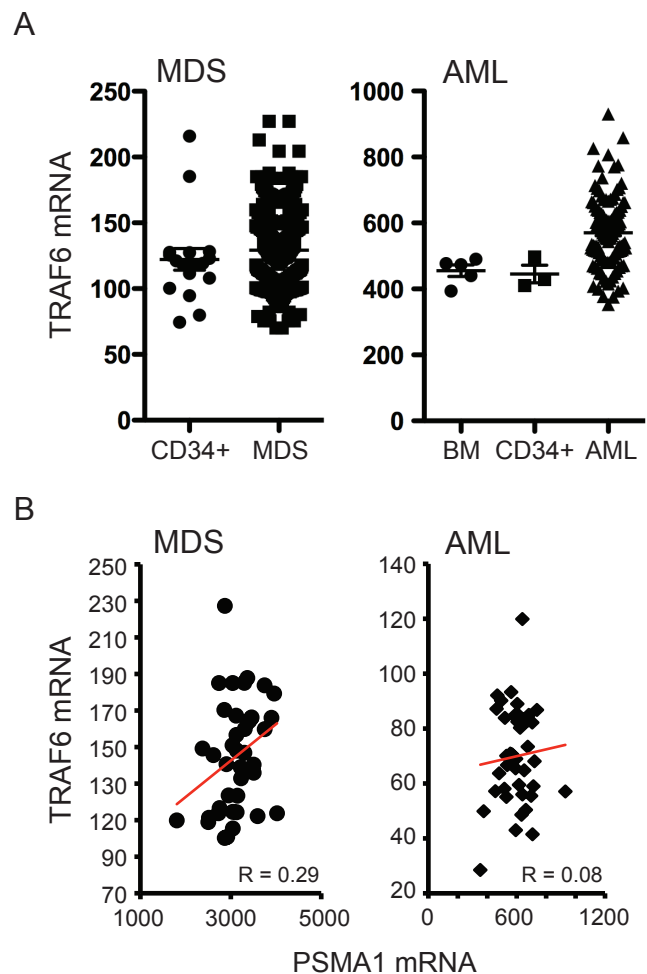

**Expression of TRAF6 and PSMA1 in MDS and AML patients.** (A) Expression of TRAF6 from previously published microarray analyses is shown for MDS (Pellagatti, et al., 2006) and AML (Valk et al., 2004) CD34+ cells. (B) Co-expression of TRAF6 and PSMA1 in MDS (del(5q)) and AML (M2) is shown.
